# Supplementary material for: Biocatalytic reductive amination with CRISPR-Cas9 engineered yeast
Source: Springer Nature journal article supplement (doi:10.1038/s41598-025-01182-0), 2025-05-15

Figure S4

p1

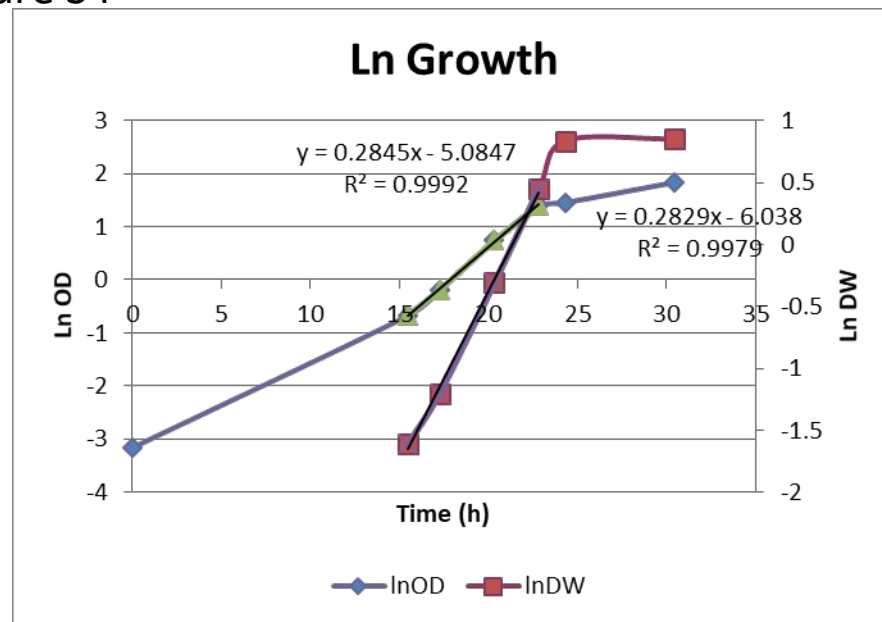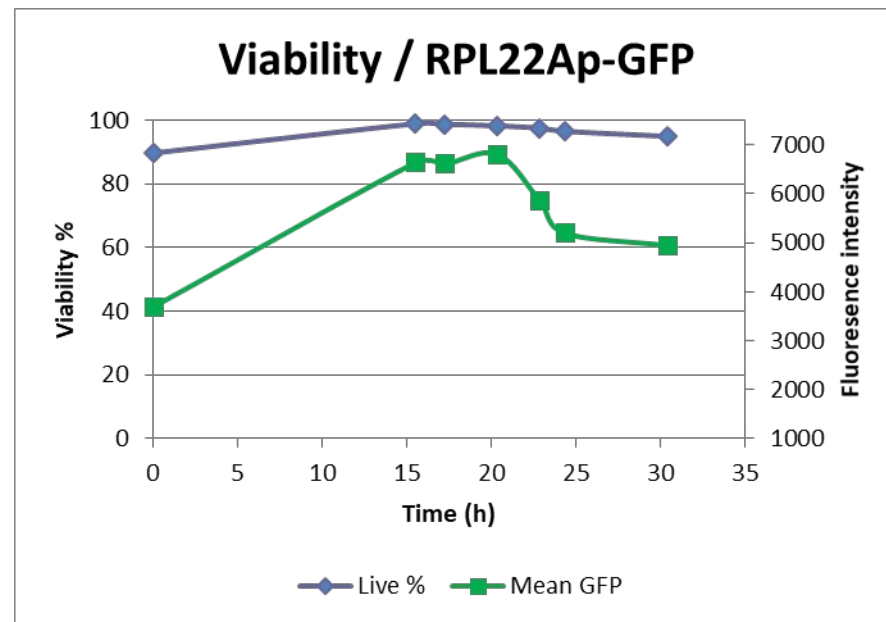

TMBAH19 [A] 0x

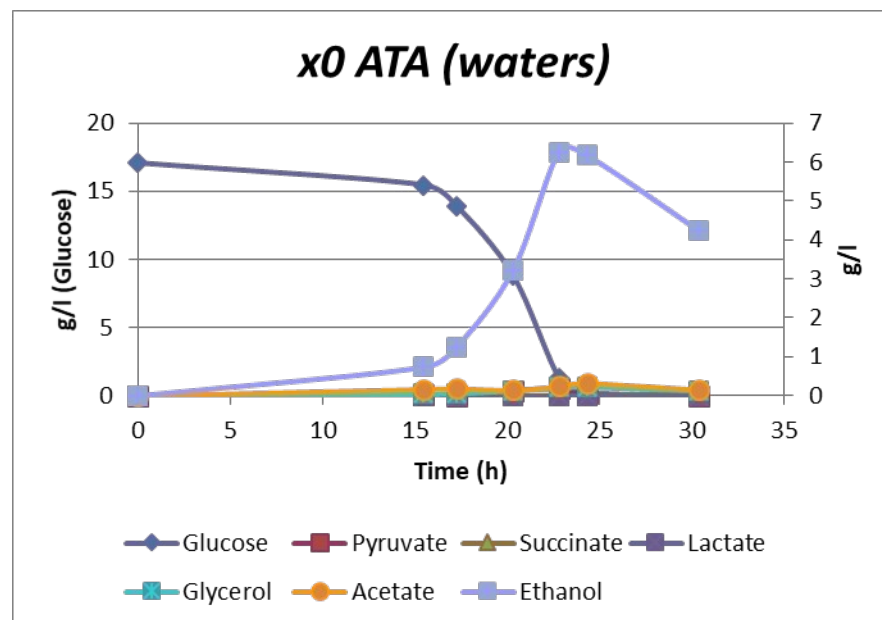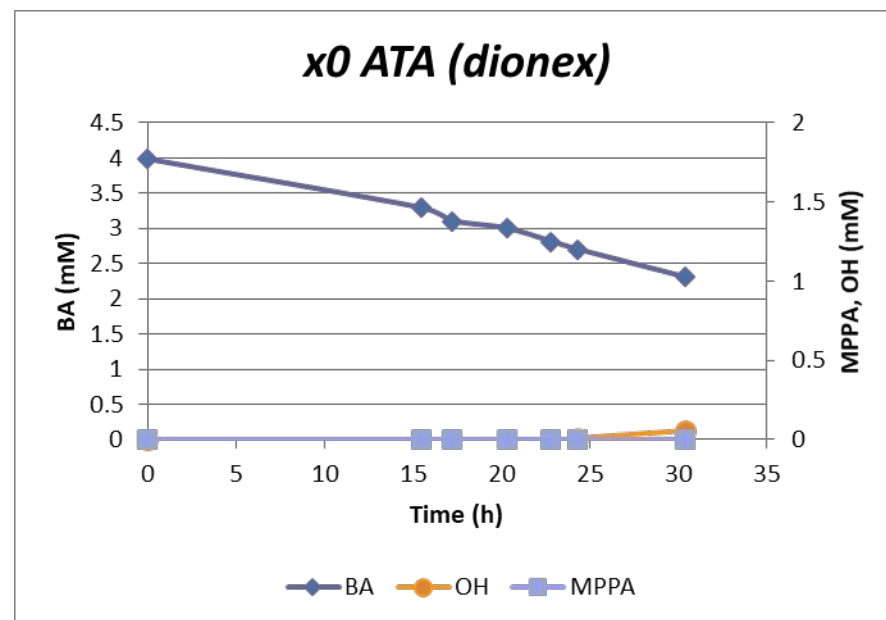

Figure S4

p2

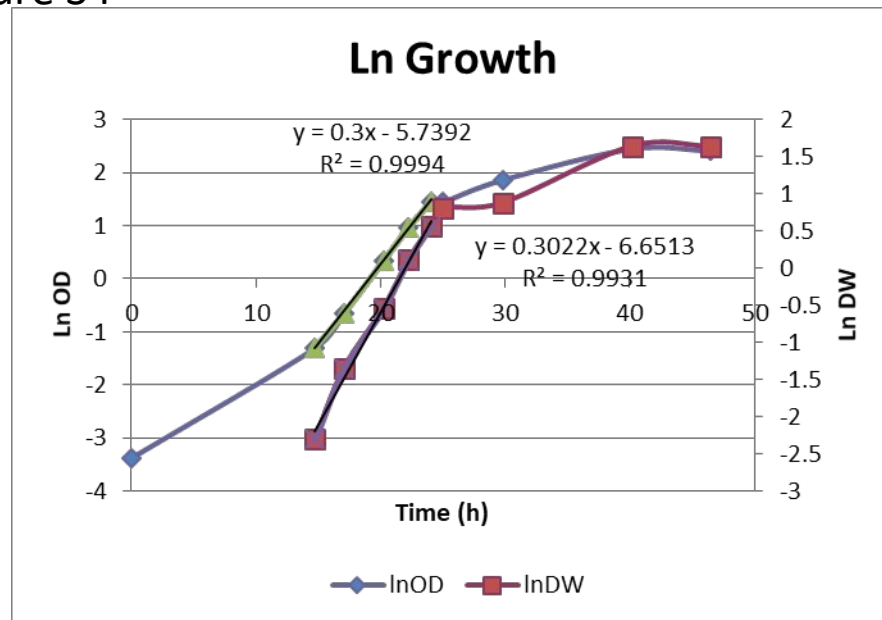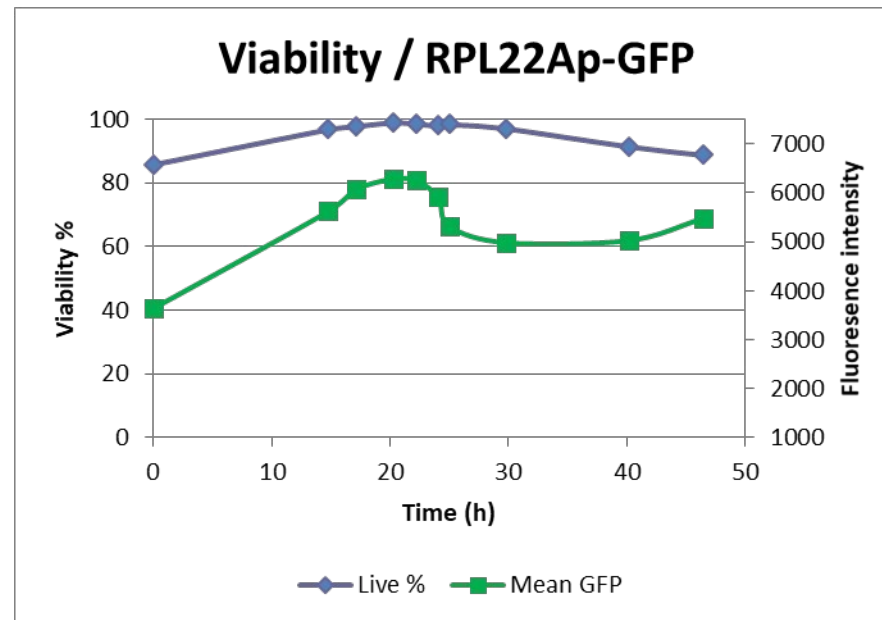

TMBAH19 [B] 0x

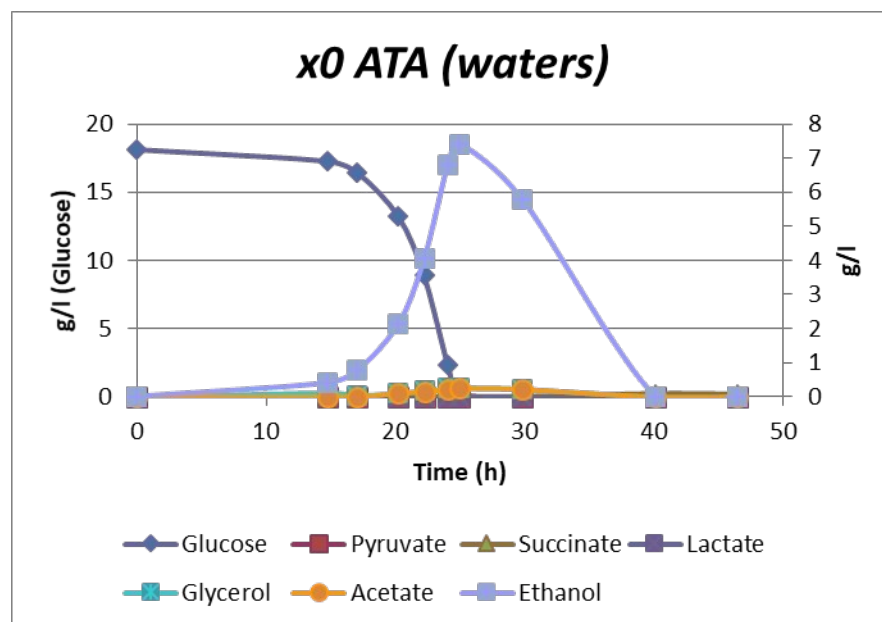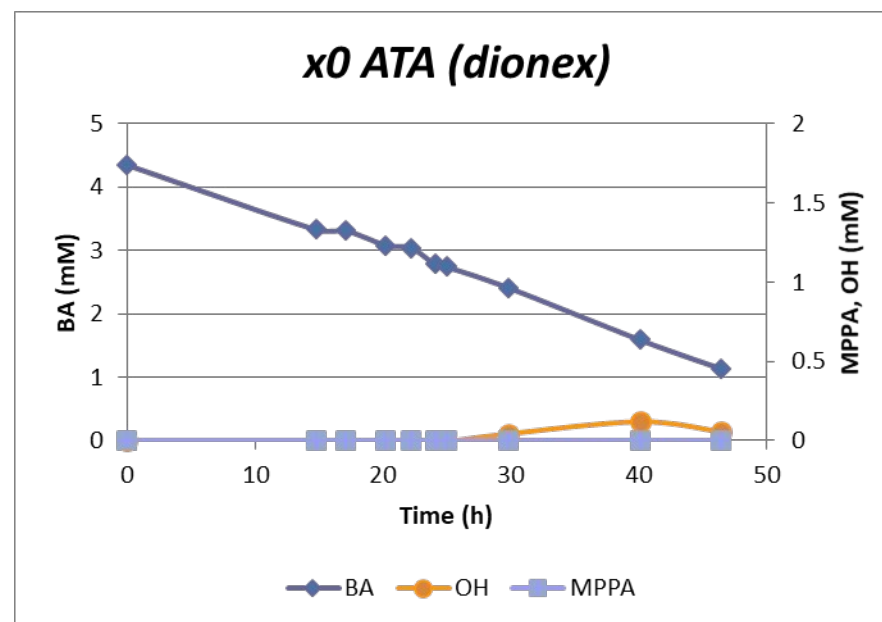

Figure S4

p3

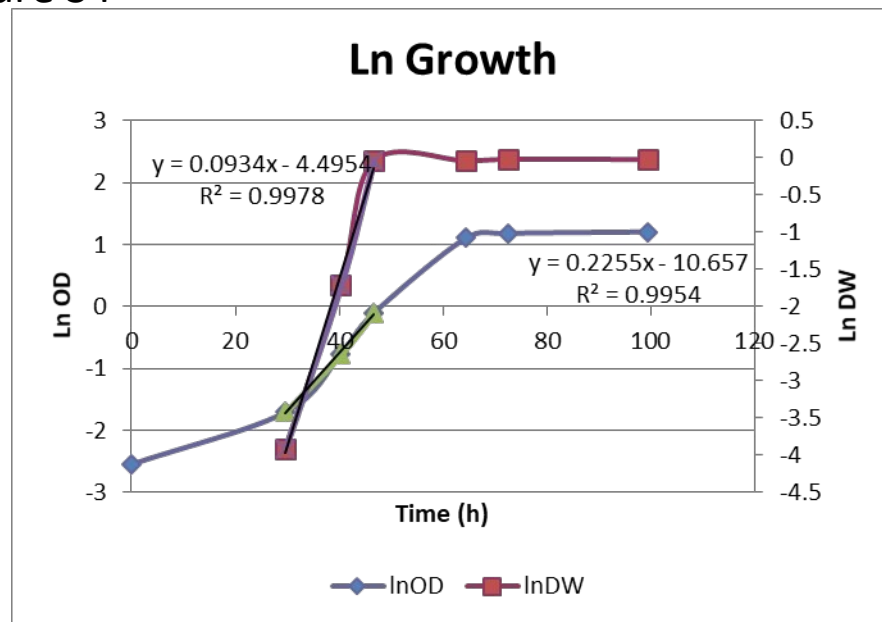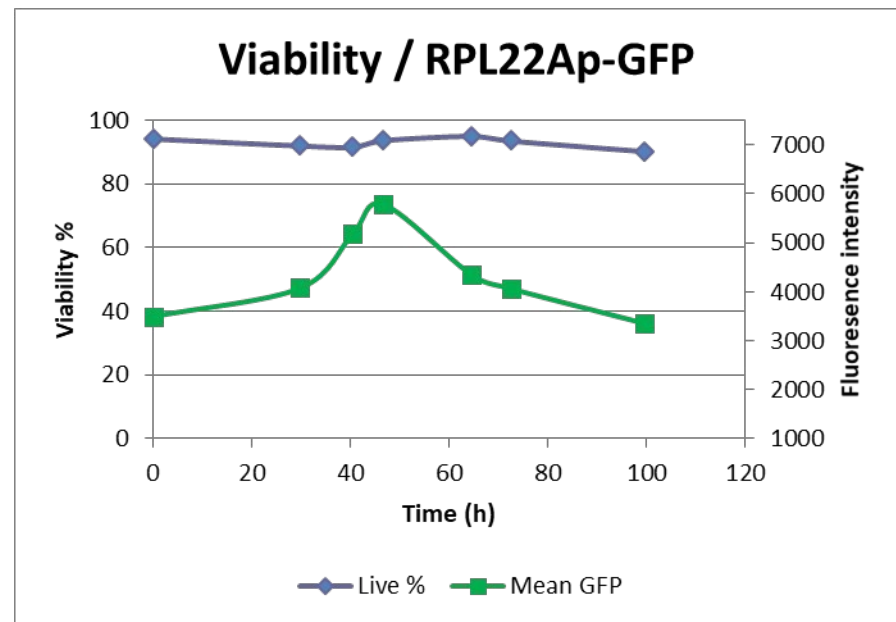TMBAH58 0x (Alt1 $\Delta$ ::NatMX)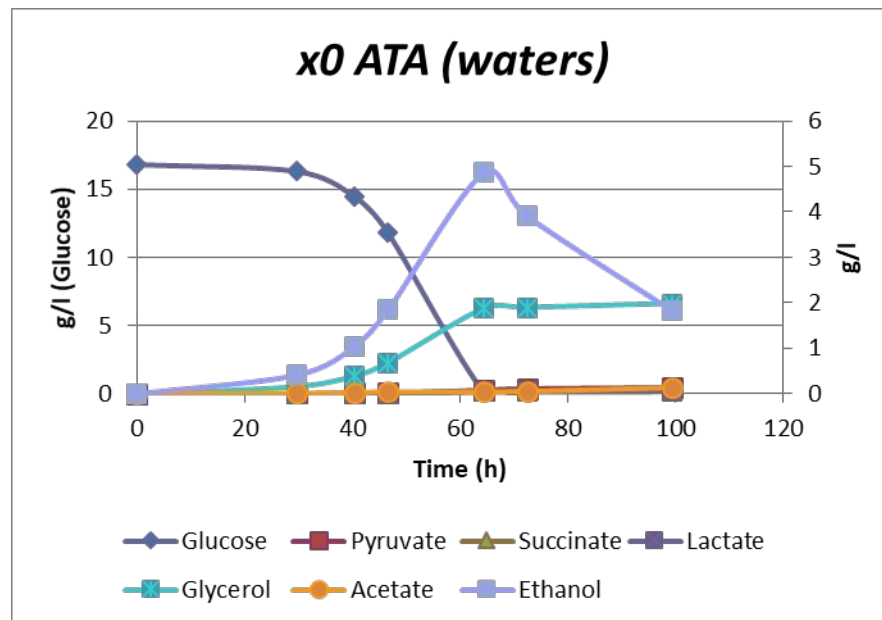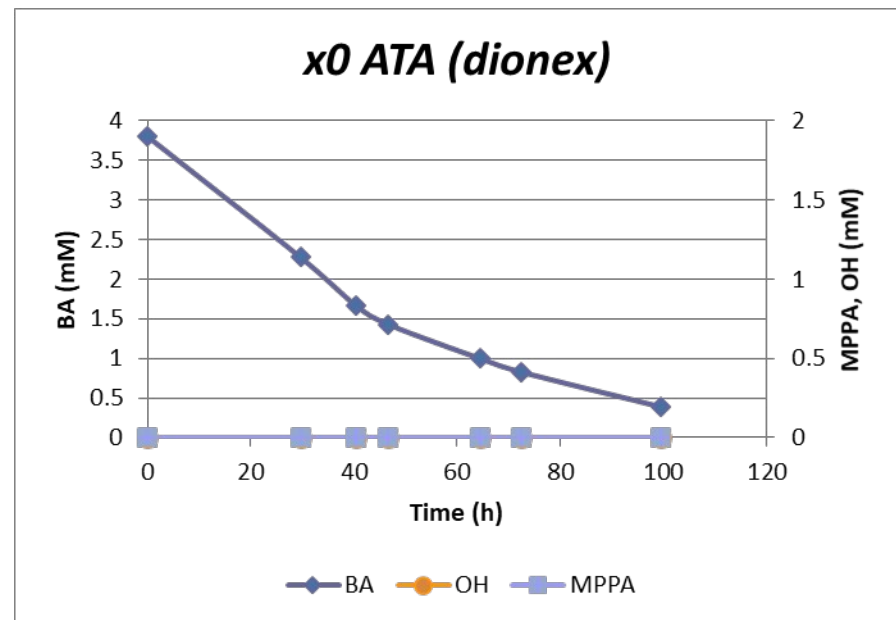

Figure S4

p4

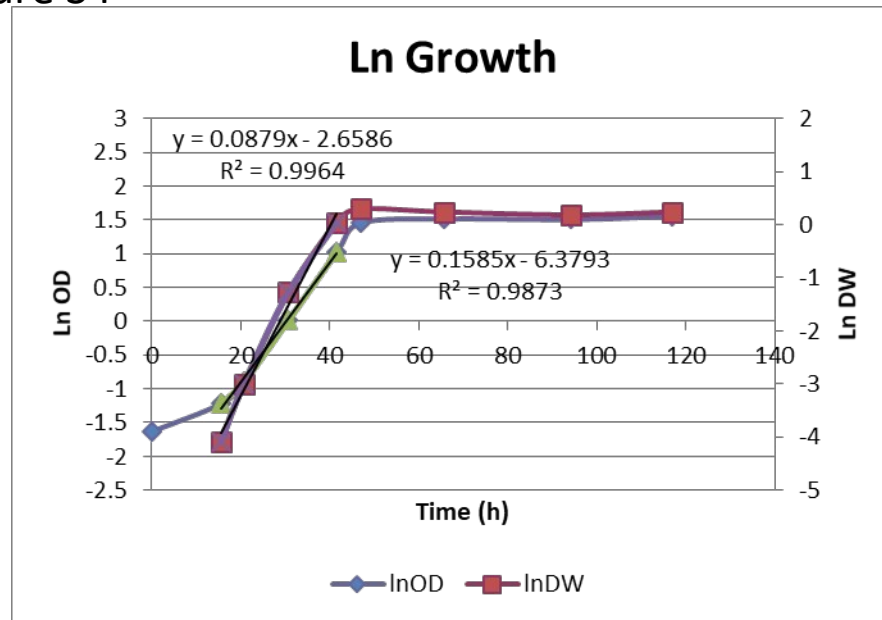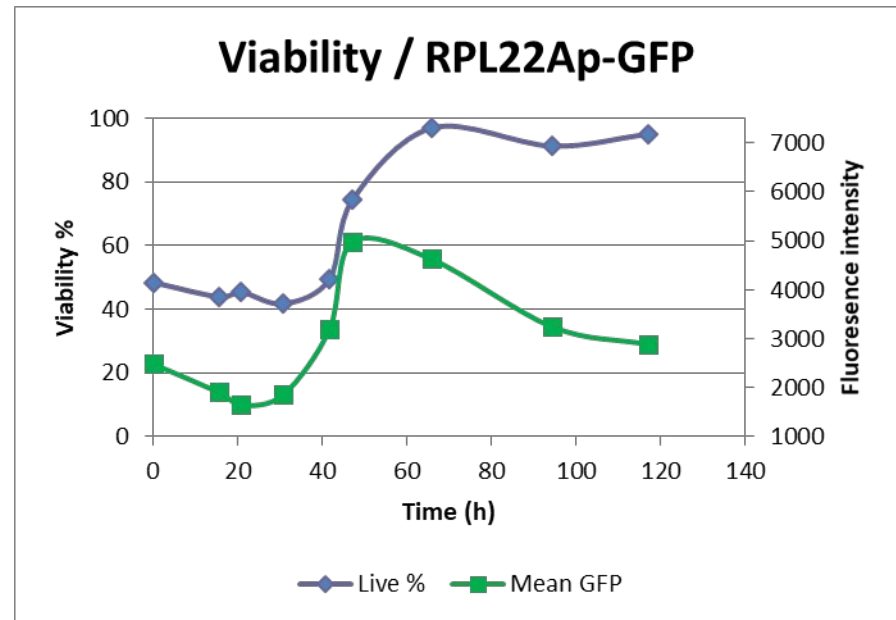

TMBAH61 [A] 1x (Alt1Δ::ATA)

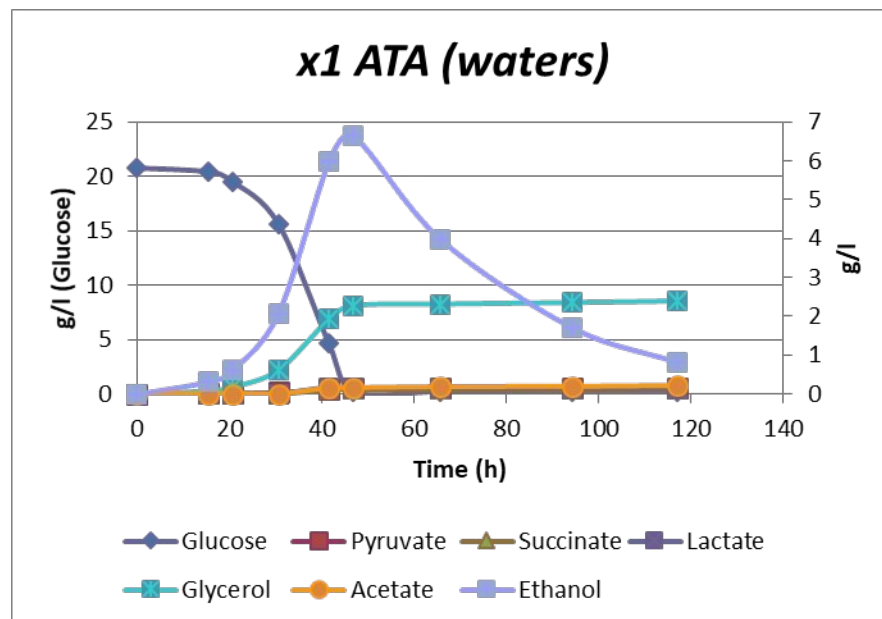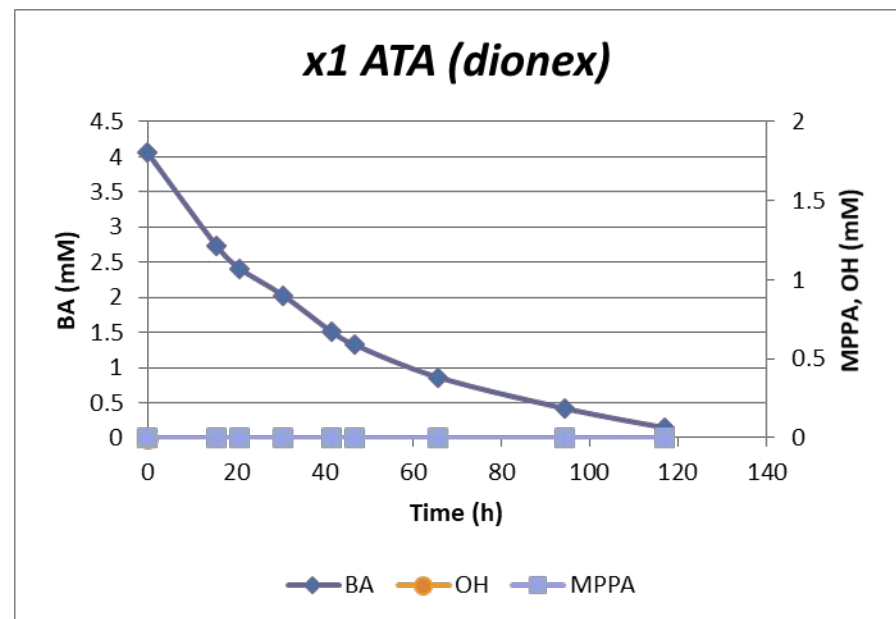

Figure S4

p5

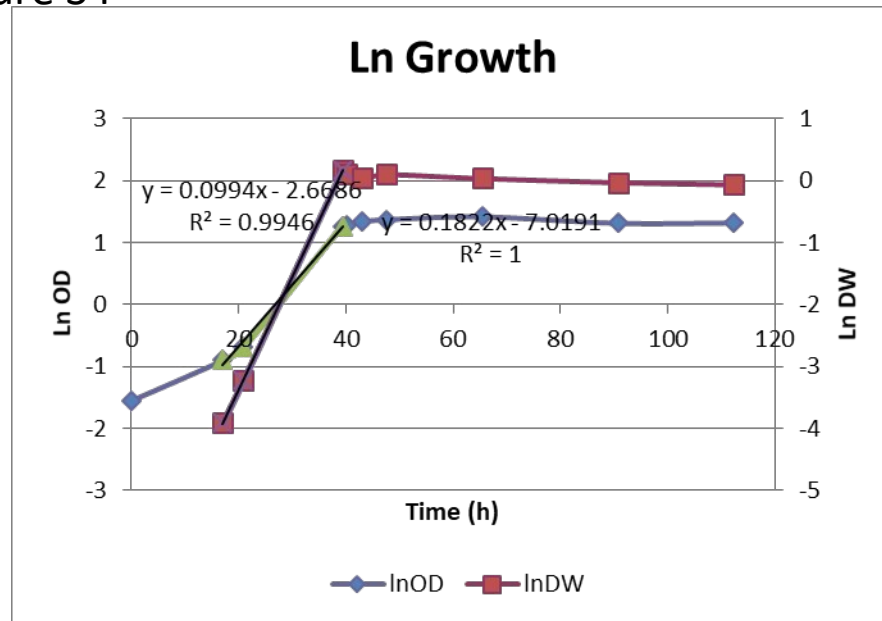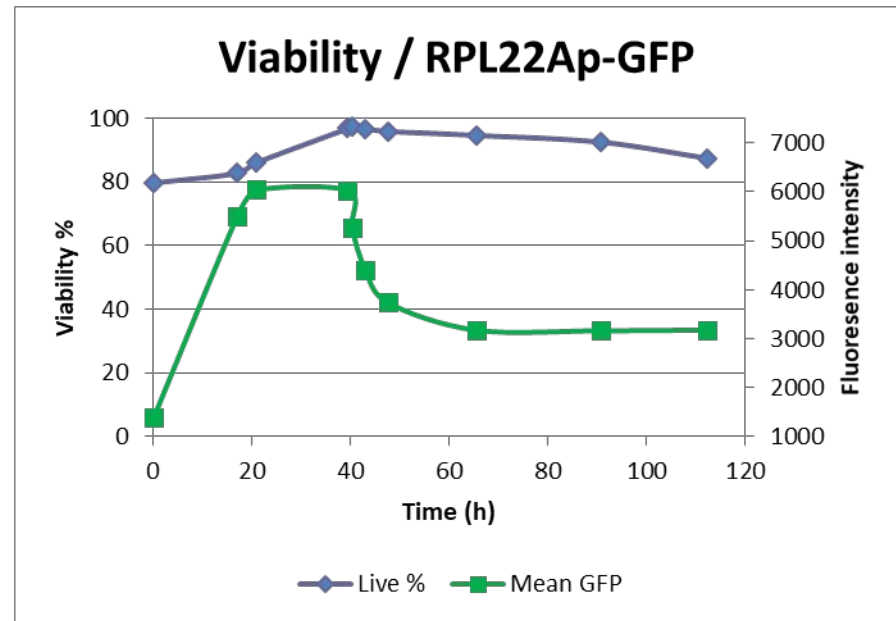

TMBAH61 [B] 1x (Alt1Δ::ATA)

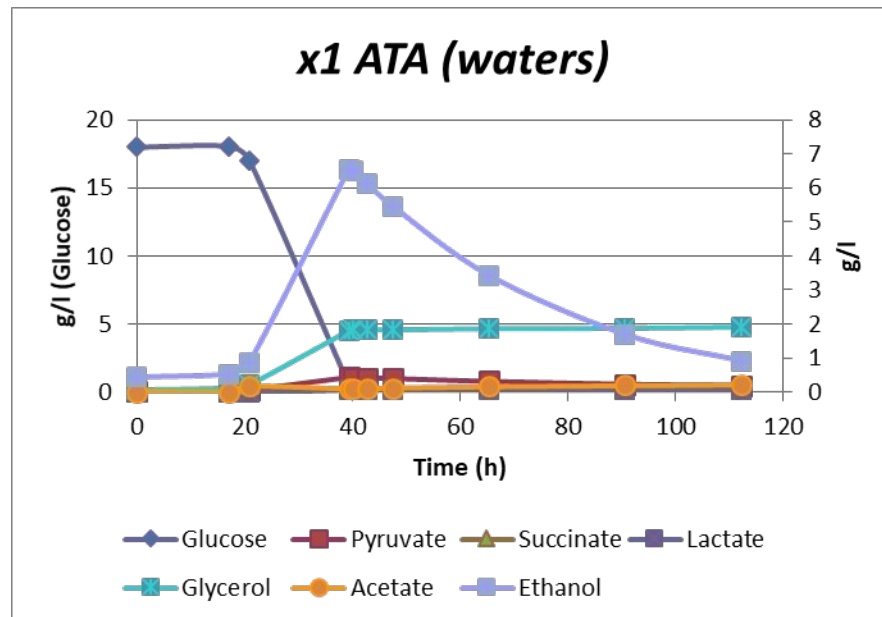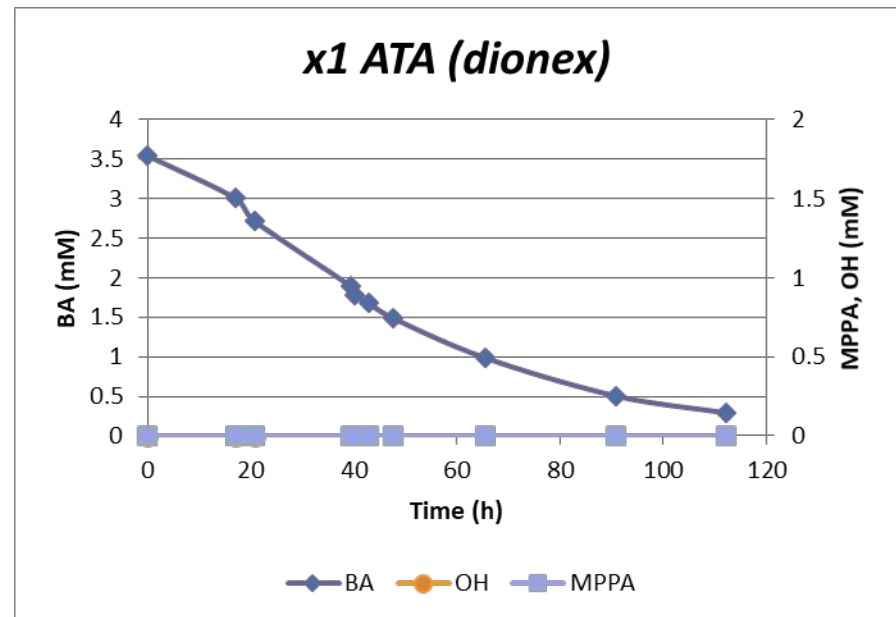

Figure S4

p6

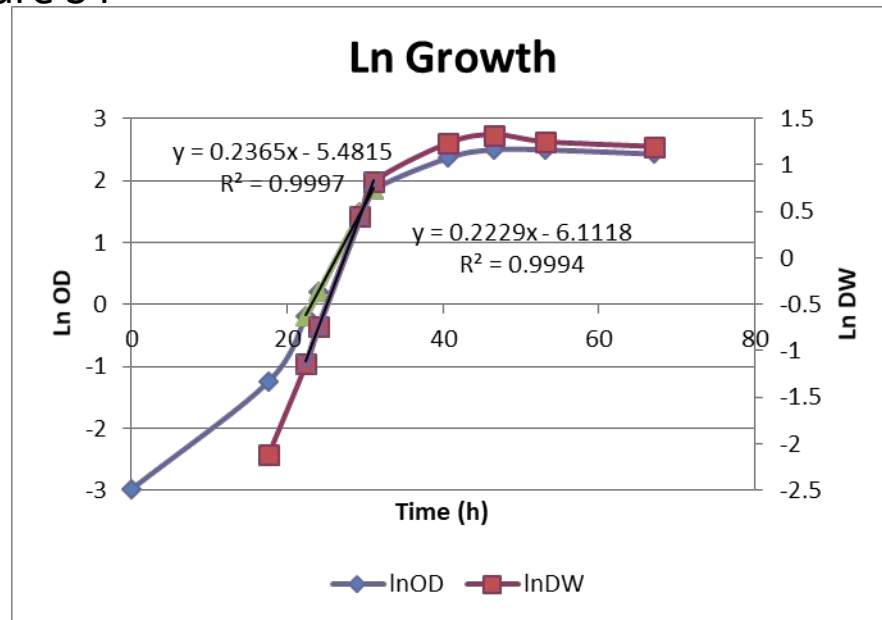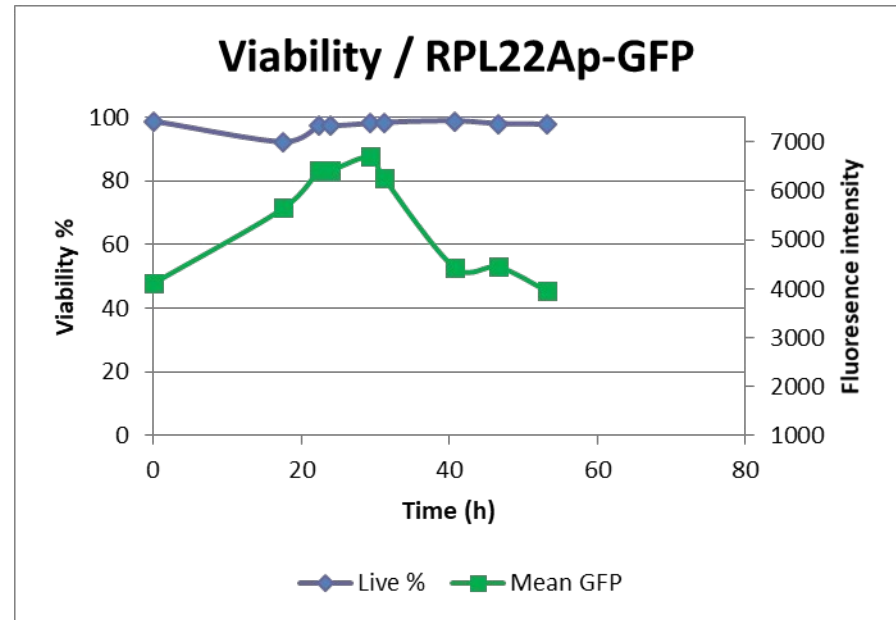

TMBAH60 1x (Alt1Δ::ATA) 113-7D

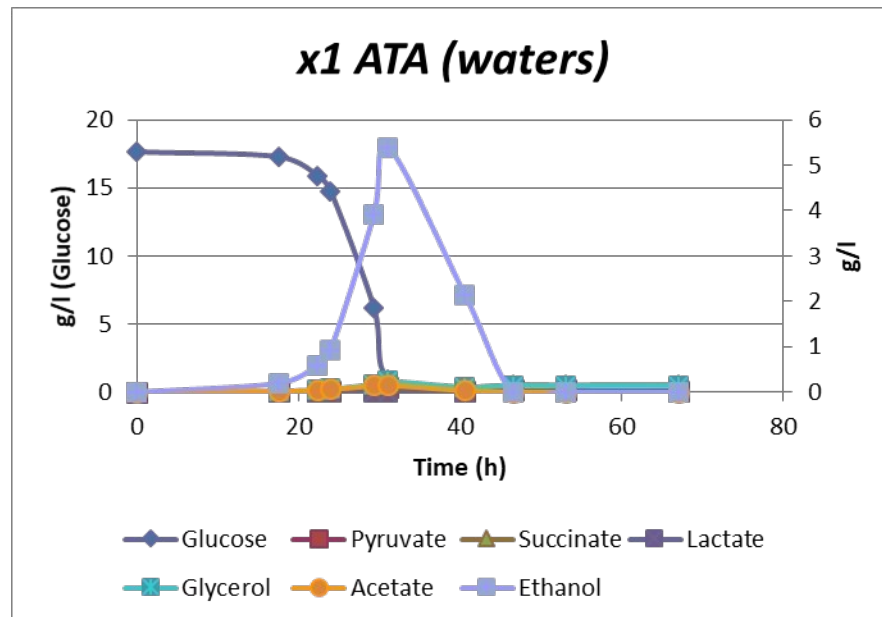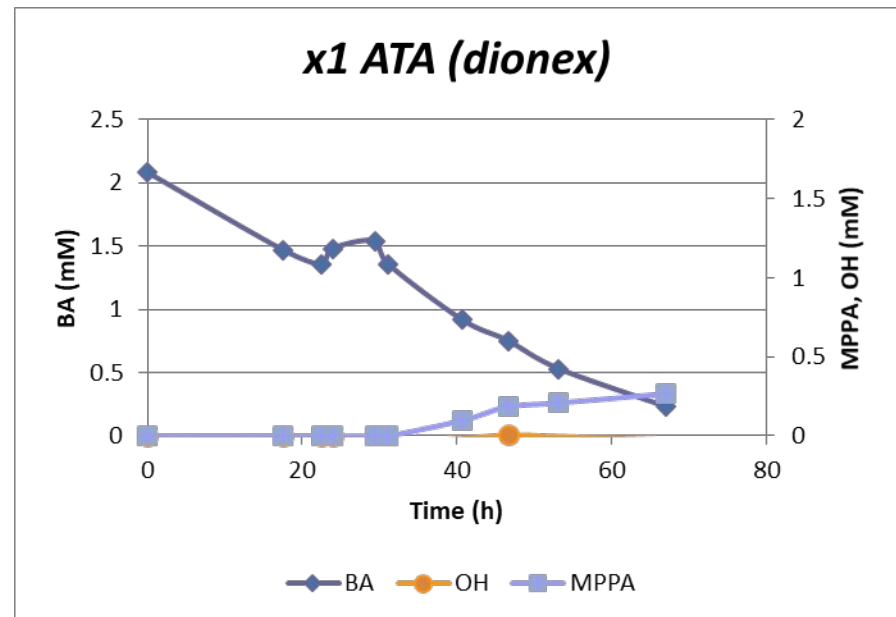

Figure S4

p7

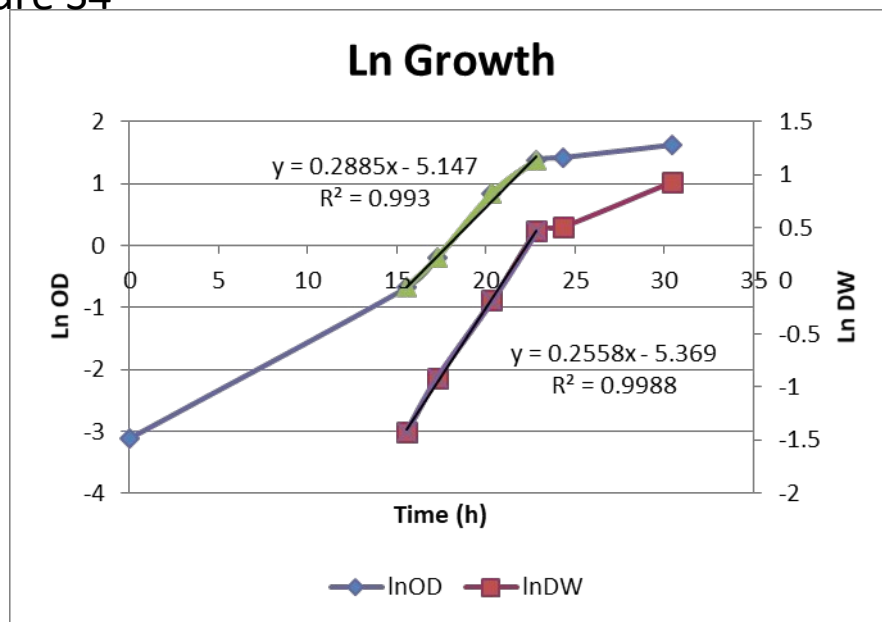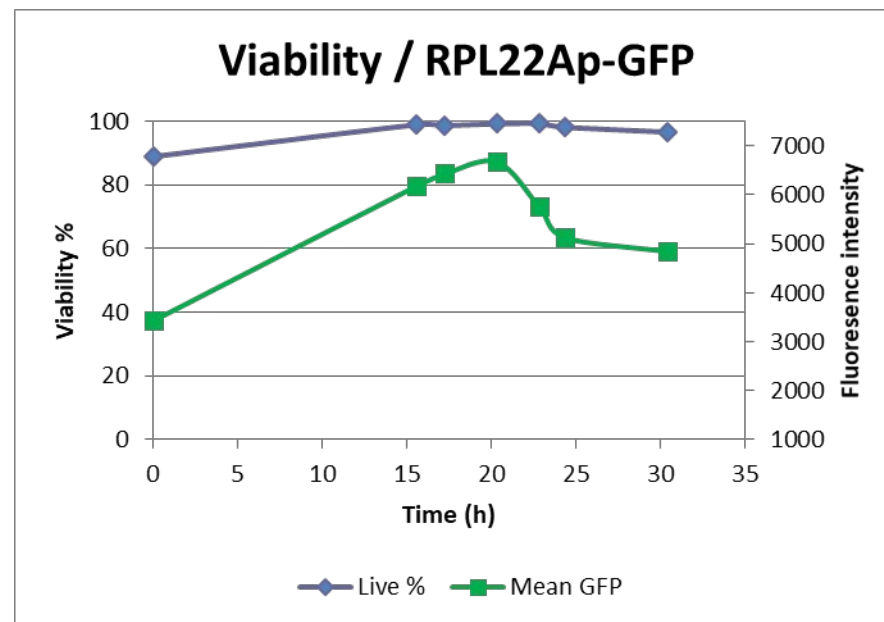

TMBAH25 [A] 6x

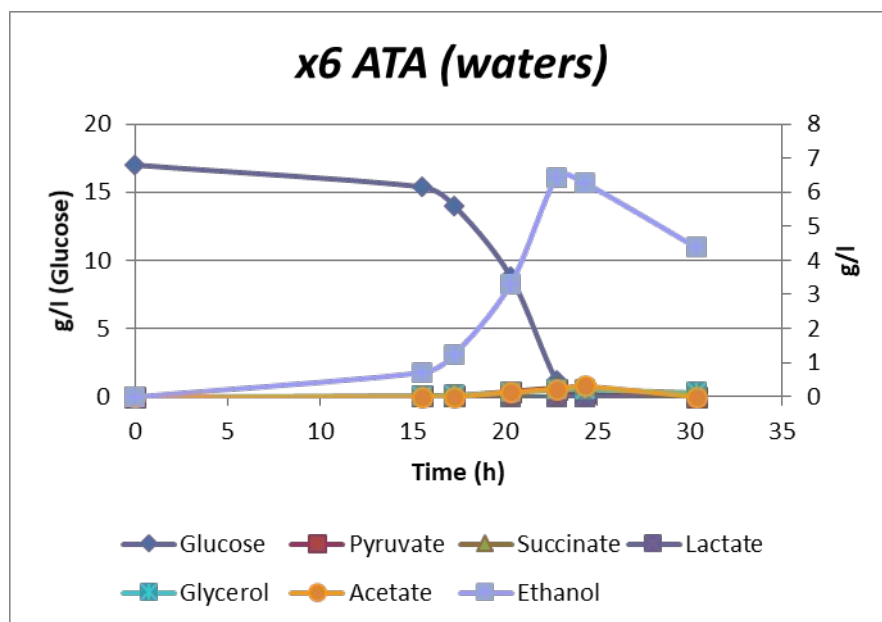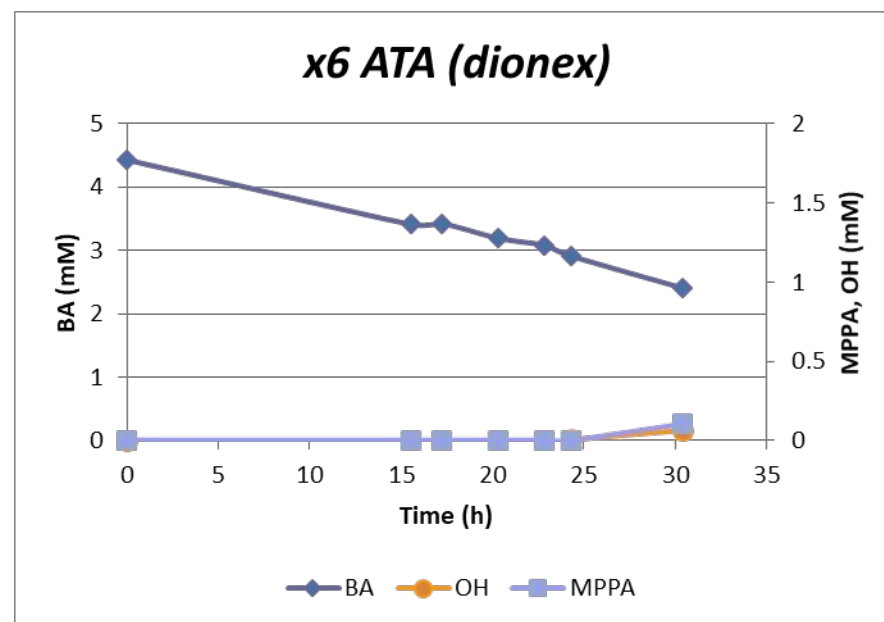

Figure S4

p8

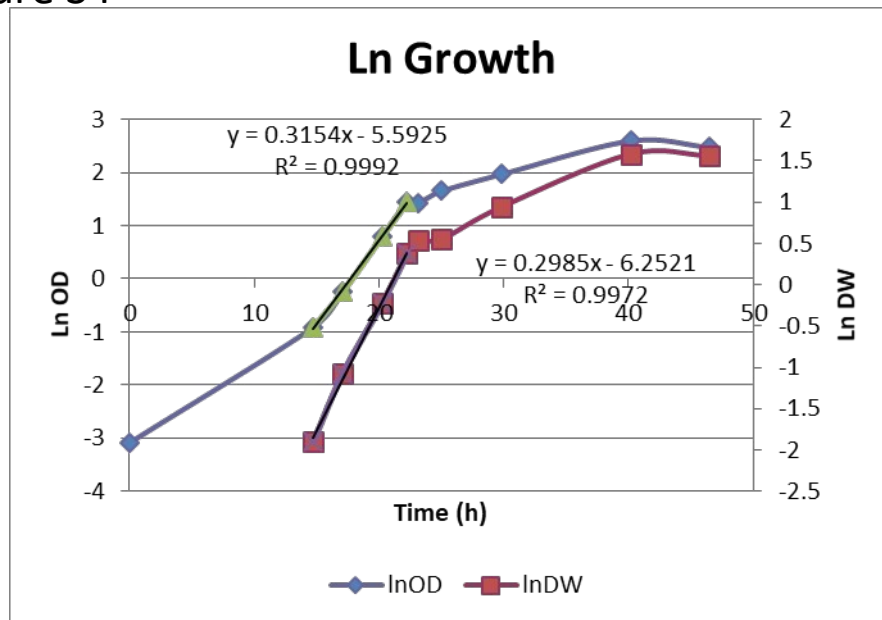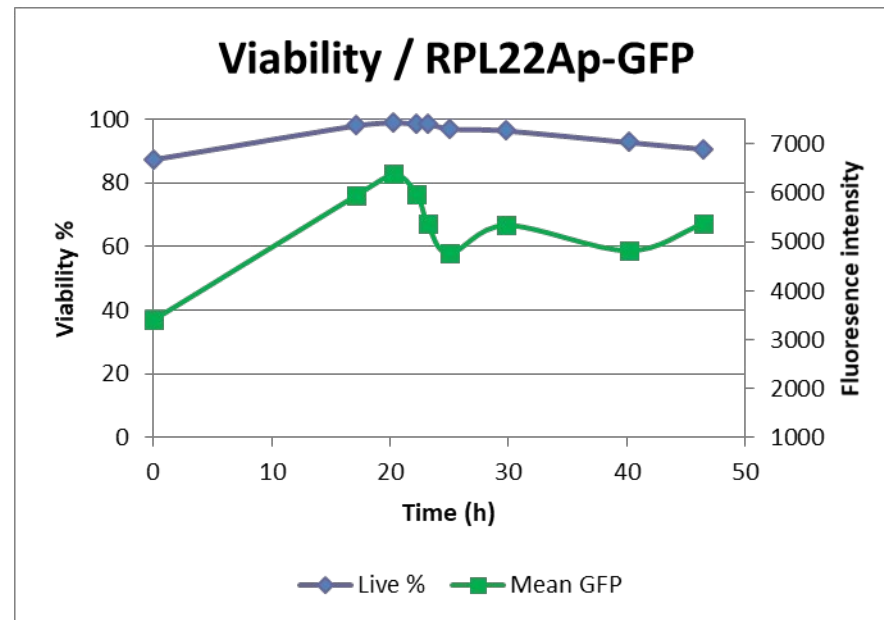

TMBAH25 [B] 6x

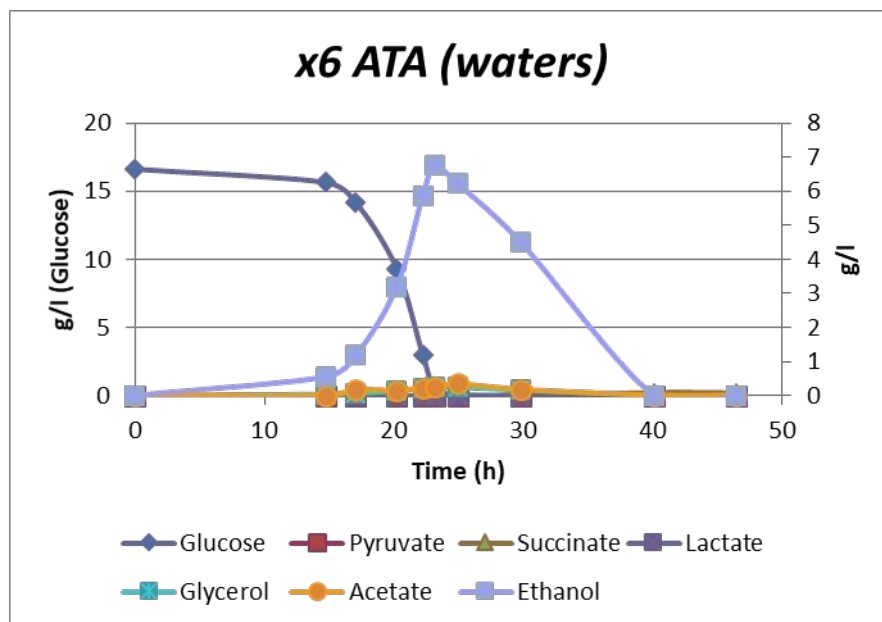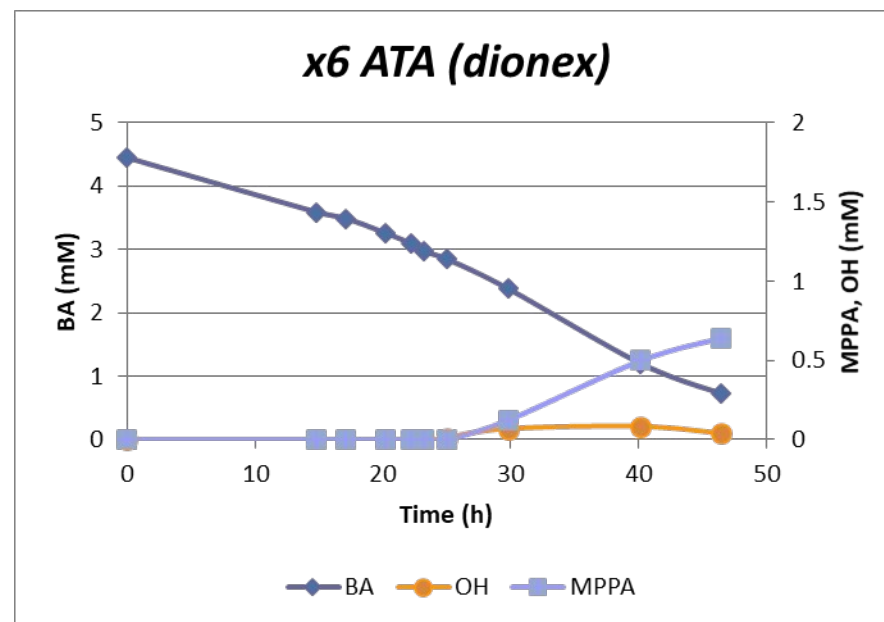



Figure S4

p9

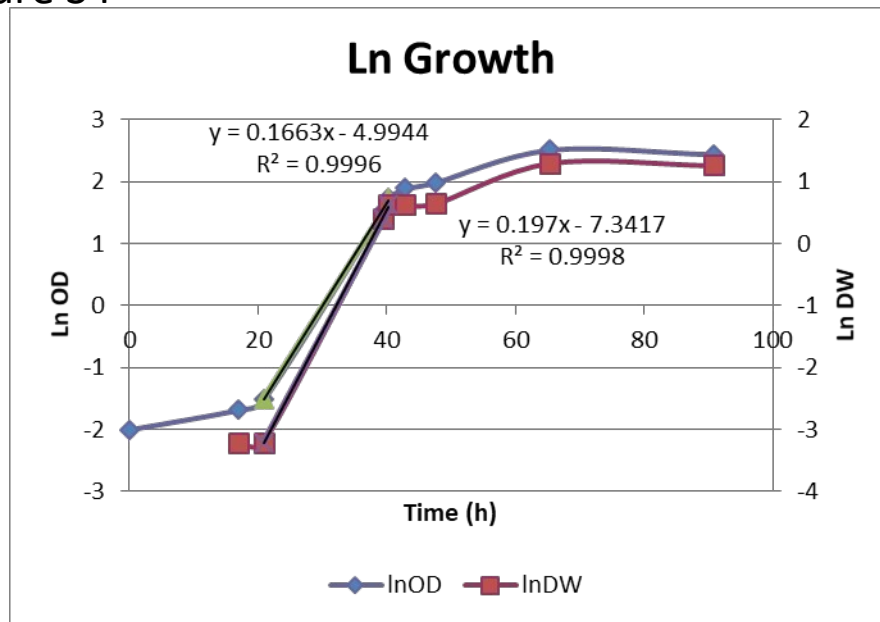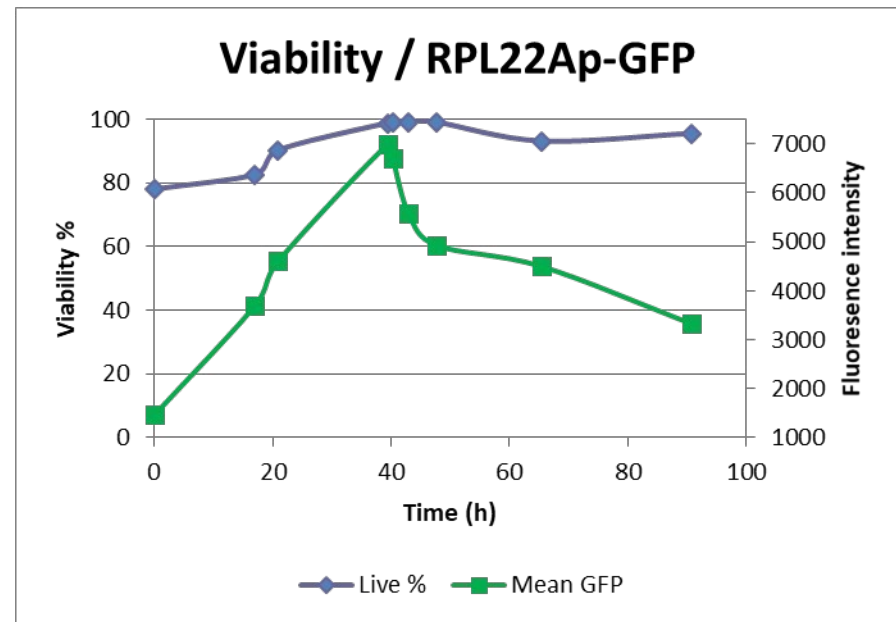

TMBAH62 [A] 7x (Alt1Δ::ATA)

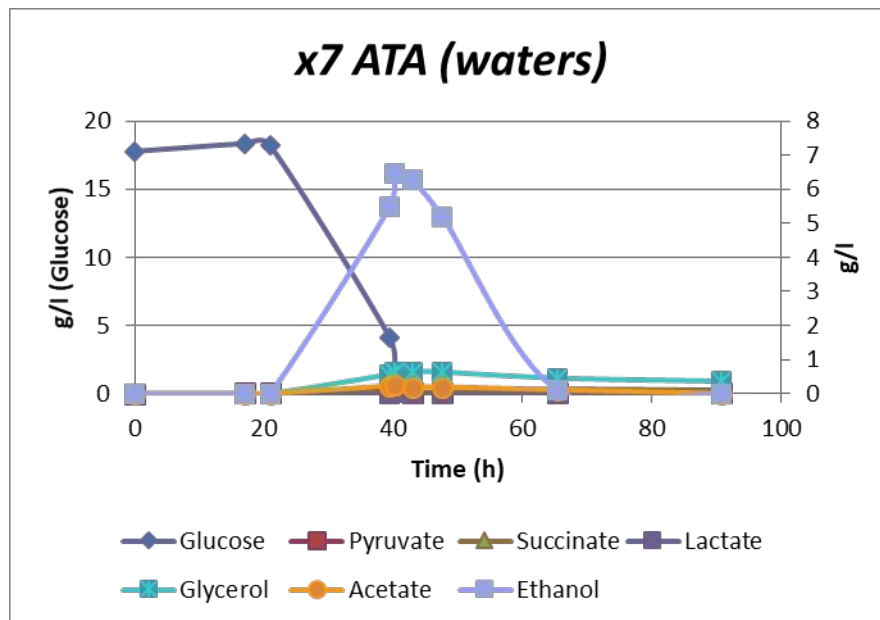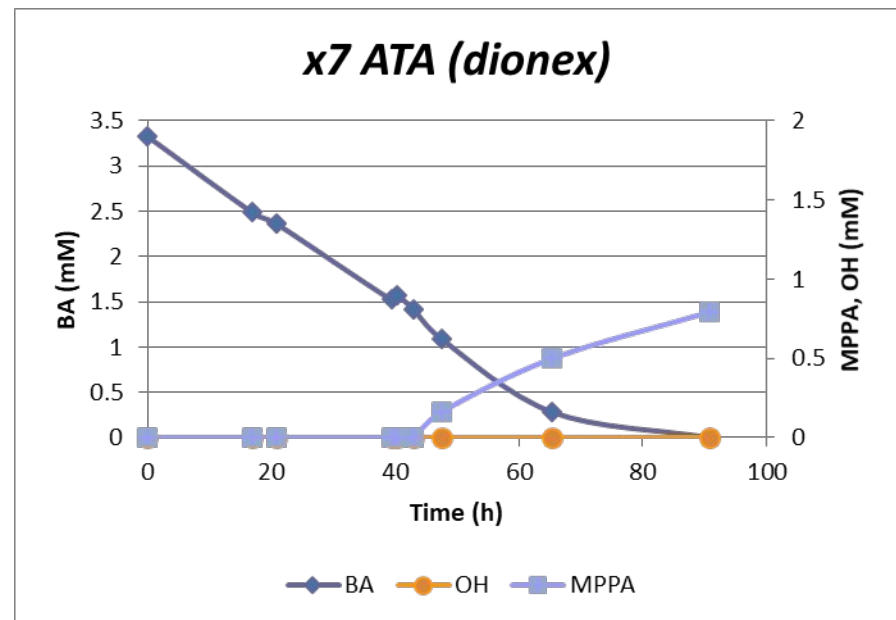

Figure S4  
p10

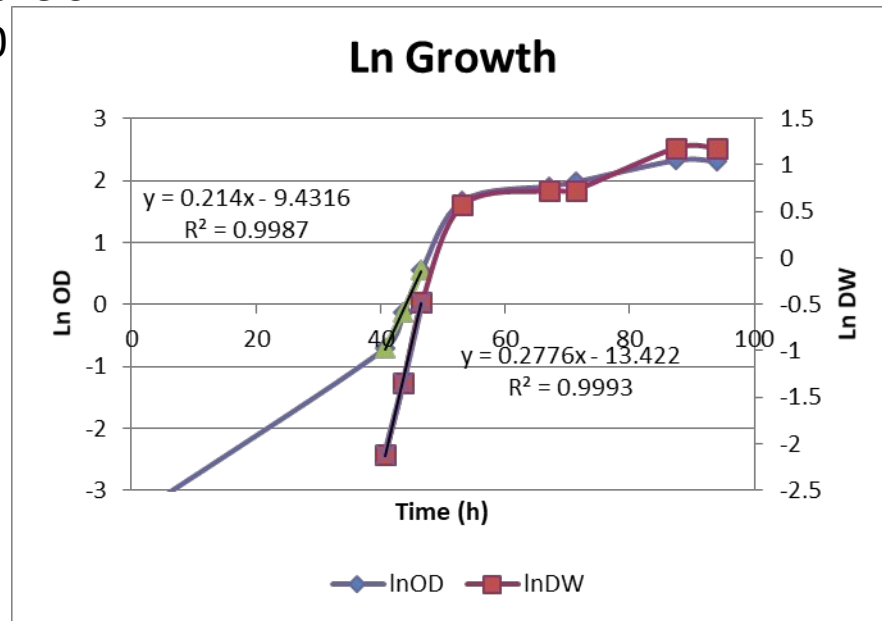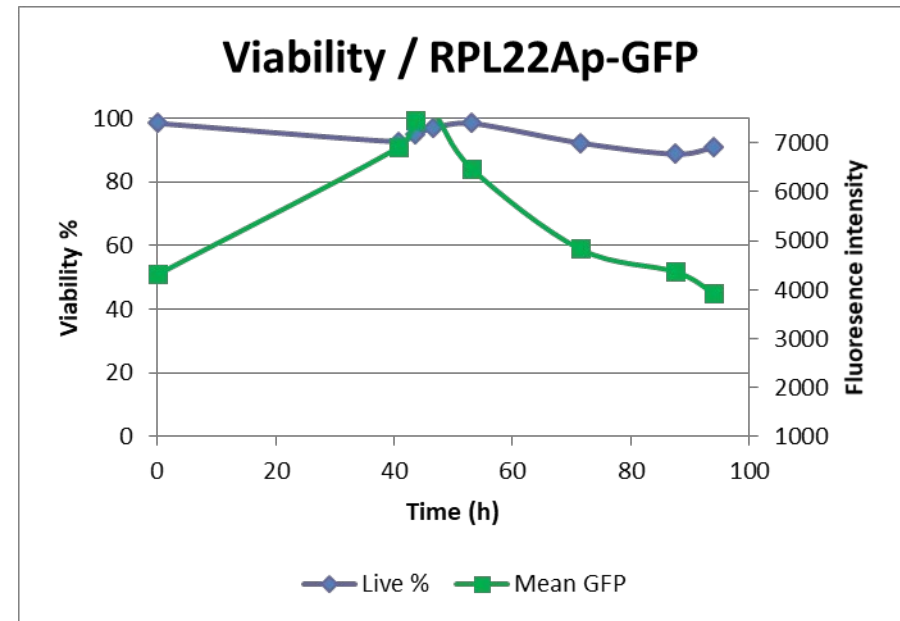

TMBAH62 [B] 7x (Alt1Δ::ATA)

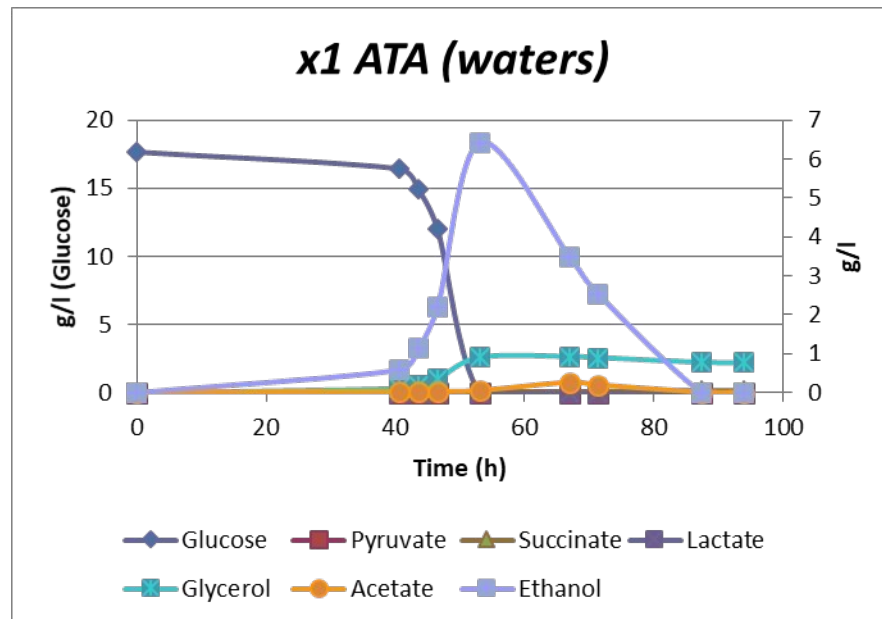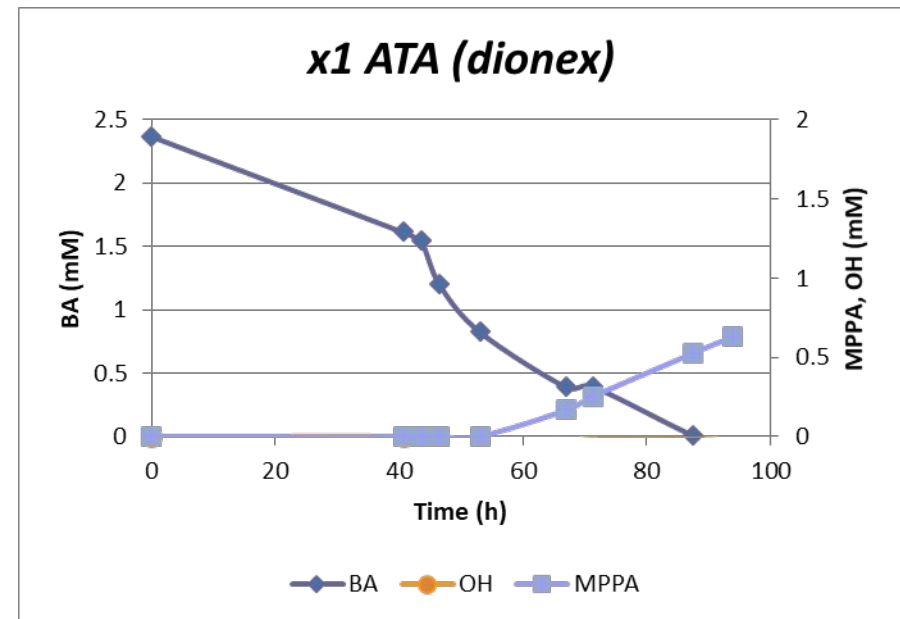

Supplement: MOESM1 [file 41598_2025_1182_MOESM1_ESM.pdf]
